# Supplementary material for: Next-generation sequencing for virus detection: covering all the bases
Source: PubMed Central journal article supplement (PMC4890495; doi:10.1186/s12985-016-0539-x), 2016-06-02

**A**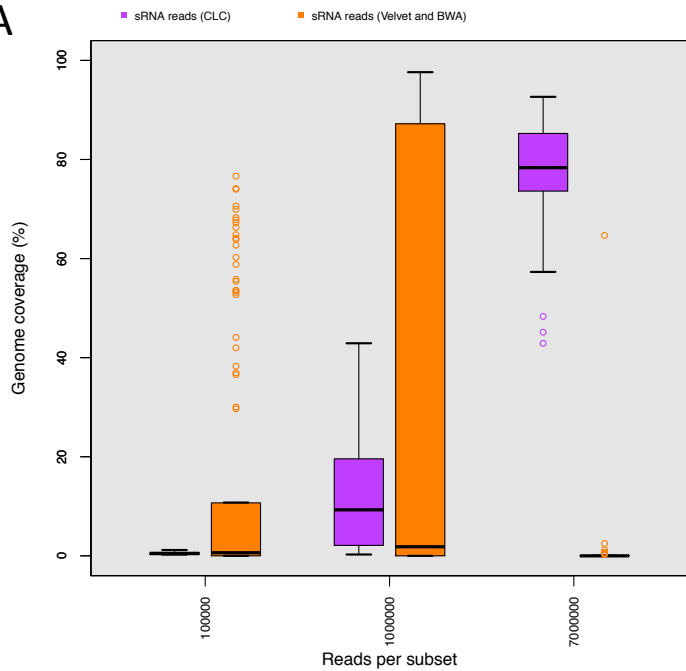**B**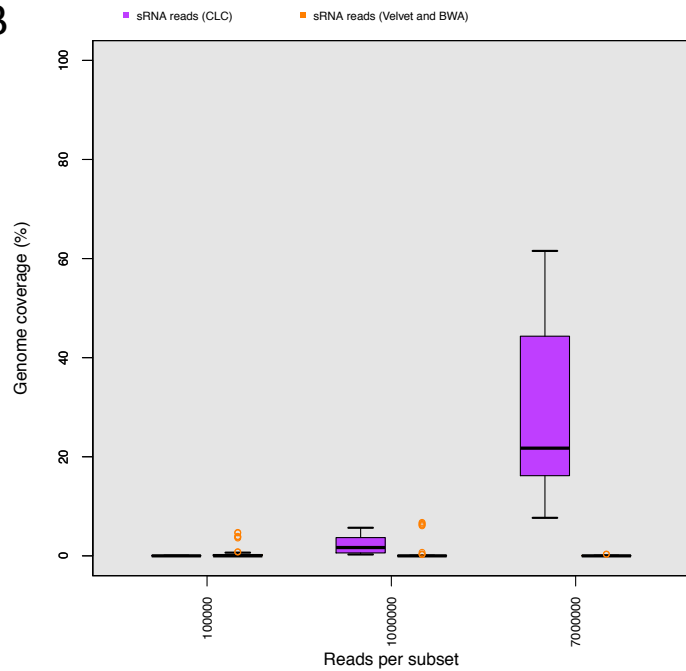**C**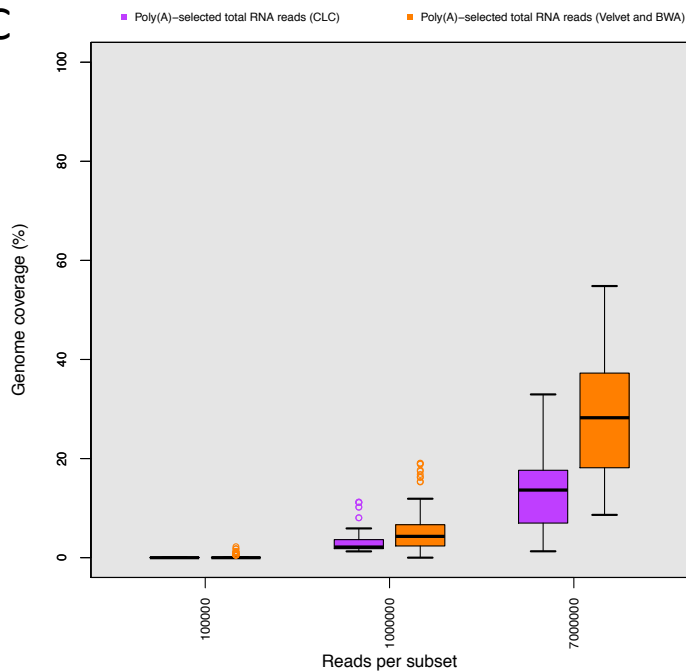**D**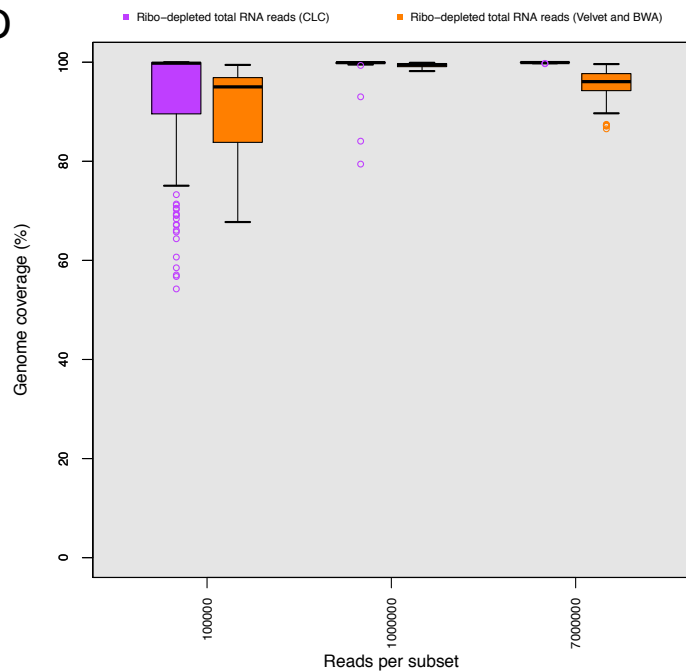

Supplement: 12985_2016_539_MOESM3_ESM.pdf [file 12985_2016_539_MOESM3_ESM.pdf]
