# Supplementary material for: Next-generation sequencing for virus detection: covering all the bases
Source: Springer Nature journal article supplement (doi:10.1186/s12985-016-0539-x), 2016-06-01

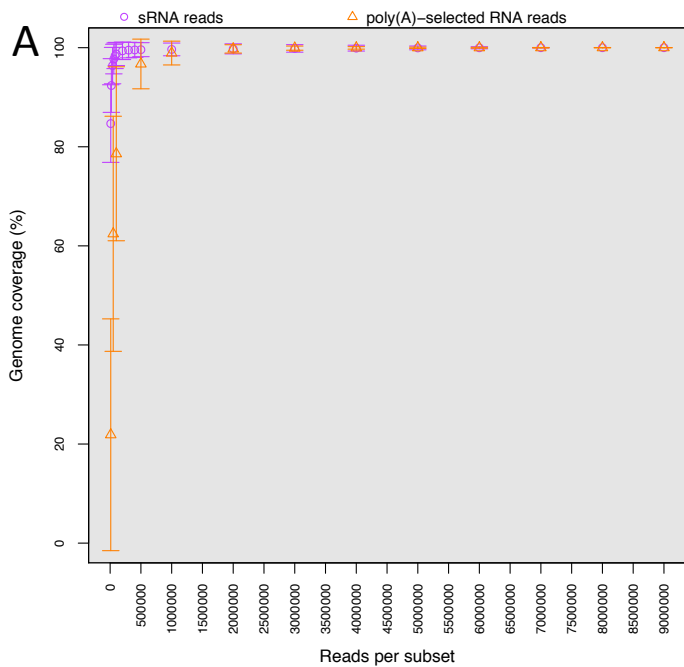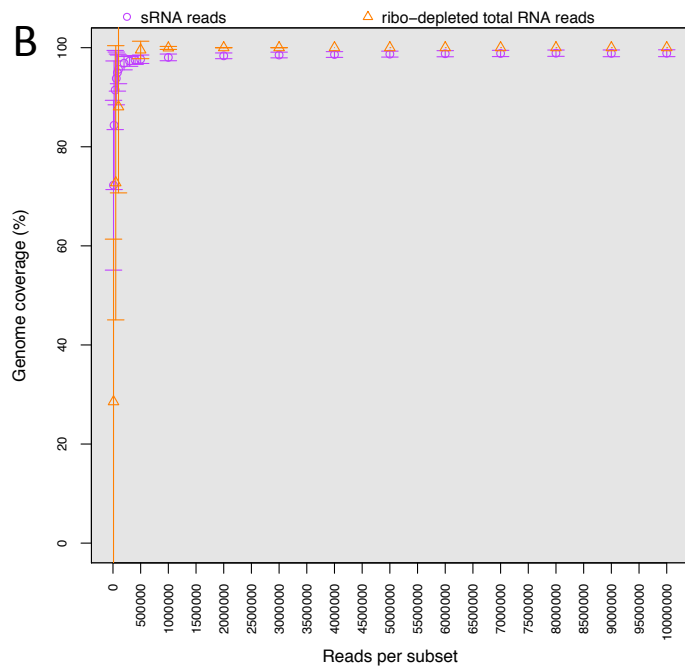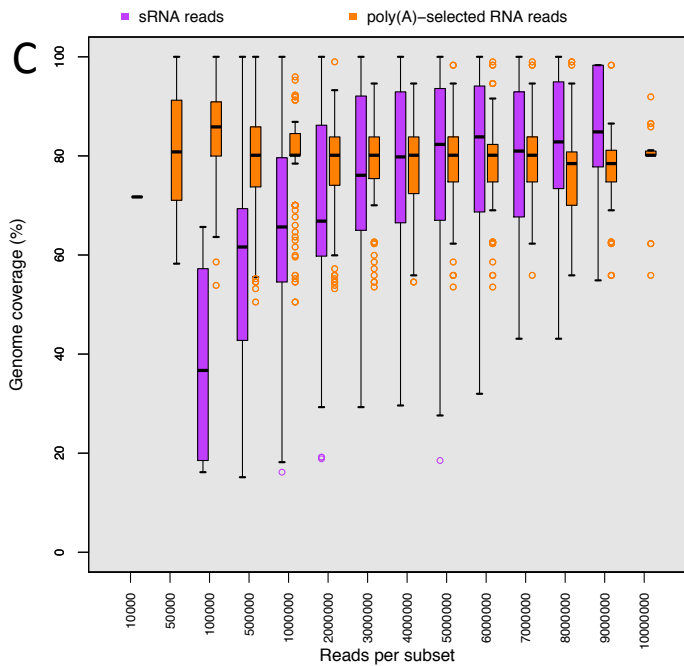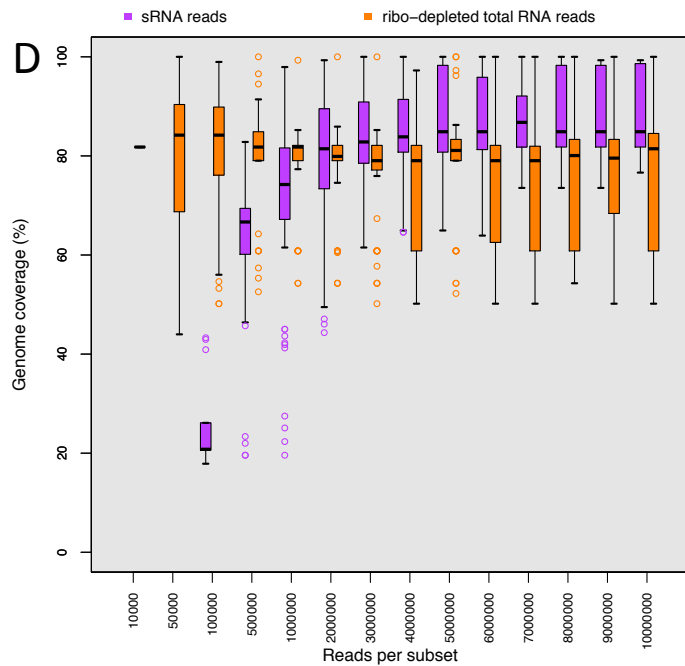

Supplement: MOESM1 [file 10244682]
